# Supplementary material
Source: bioRxiv or medRxiv preprint supplement (https://www.biorxiv.org/highwire/filestream/95142/field_highwire_adjunct_files/0/309898-1.pdf)
Supplement: Supplementary file [file 309898-1.pdf]

## Supplemental Material

### **Multi-omics approach identifies novel pathogen-derived prognostic biomarkers in patients with *Pseudomonas aeruginosa* bloodstream infection**

Matthias Willmann<sup>1,2</sup>, Stephan Göttig<sup>3</sup>, Daniela Bezdán<sup>4,5</sup>, Boris Maček<sup>6</sup>, Ana Velic<sup>6</sup>, Matthias Marschal<sup>1</sup>, Wichard Vogel<sup>7</sup>, Ingo Flesch<sup>8</sup>, Uwe Markert<sup>9</sup>, Annika Schmidt<sup>1</sup>, Pierre Kübler<sup>1</sup>, Maria Haug<sup>1</sup>, Mumina Javed<sup>1,2</sup>, Benedikt Jentzsch<sup>1,2</sup>, Philipp Oberhettinger<sup>1</sup>, Monika Schütz<sup>1,2</sup>, Erwin Bohn<sup>1,2</sup>, Michael Sonnabend<sup>1,2</sup>, Kristina Klein<sup>1,2</sup>, Ingo B Autenrieth<sup>1,2</sup>, Stephan Ossowski<sup>4,5,10</sup>, Sandra Schwarz<sup>1</sup>, and Silke Peter<sup>1,2</sup>

<sup>1</sup>Institute of Medical Microbiology and Hygiene, University of Tübingen, Tübingen, Germany

<sup>2</sup>German Center for Infection Research (DZIF), partner site Tübingen, Tübingen, Germany

<sup>3</sup>Institute for Medical Microbiology and Infection Control, University Hospital, Goethe-University, Frankfurt am Main, Germany

<sup>4</sup>Centre for Genomic Regulation (CRG), The Barcelona Institute of Science and Technology, Barcelona, Spain

<sup>5</sup>Universitat Pompeu Fabra (UPF), Barcelona, Spain

<sup>6</sup>Proteome Center Tübingen, Auf der Morgenstelle, Tübingen, Germany

<sup>7</sup>Medical Center, Department of Hematology, Oncology, Immunology, Rheumatology & Pulmonology, University of Tübingen, Tübingen, Germany

<sup>8</sup>BG Trauma Center, University of Tübingen, Tübingen, Germany

<sup>9</sup>Clinic for General, Visceral and Vascular Surgery, Zollernalb Hospital, Albstadt, Germany

<sup>10</sup>Institute of Medical Genetics and Applied Genomics, University of Tübingen, Tübingen, Germany

## Tables

**Table S1: Basic prevalence characteristics of the patient study population (n = 166)**

| Parameter                                       | Patients n (%) |
|-------------------------------------------------|----------------|
| <b><i>Demographic characteristics</i></b>       |                |
| Age ≥ 65 years                                  | 83 (50%)       |
| Male sex                                        | 60 (36.1%)     |
| <b><i>Clinical characteristics</i></b>          |                |
| Fatal outcome (30 days)                         | 50 (30.1%)     |
| Nosocomial infection                            | 94 (65.6%)     |
| Cardiac insufficiency*                          | 24 (14.5%)     |
| Myocardial infarction*                          | 15 (9%)        |
| Peripheral arterial disease*                    | 18 (10.8%)     |
| Cerebrovascular disease*                        | 16 (9.6%)      |
| Immunosuppression                               | 110 (66.3%)    |
| Chronic lung disease*                           | 16 (9.6%)      |
| Collagenosis*                                   | 10 (6%)        |
| Liver disease*                                  | 11 (6.6%)      |
| Diabetes*                                       | 49 (29.5%)     |
| Renal disease*                                  | 22 (13.3%)     |
| Malignancies                                    | 48 (28.9%)     |
| HIV                                             | 1 (0.6%)       |
| Surgery during hospitalization                  | 66 (39.8%)     |
| <b><i>Infection-related characteristics</i></b> |                |
| Primary BSI                                     | 64 (38.6%)     |
| Catheter-related BSI                            | 17 (10.2%)     |
| Genitourinary infection source                  | 32 (19.3%)     |
| Pulmonary infection source                      | 32 (19.3%)     |
| Intraabdominal infection source                 | 17 (10.2%)     |
| Wound infection source                          | 21 (12.7%)     |
| Concomitant infections                          | 109 (65.7%)    |
| Multiple pathogens in blood culture             | 32 (19.3%)     |

\* As defined by Charlson Comorbidity Score [1]

BSI, blood stream infection; HIV, human immunodeficiency virus.

**Table S2: Univariate analysis of patient-related and clinical factors in patients with *Pseudomonas aeruginosa* bloodstream infection**

| Parameter                                        | Hazard ratio | 95% CI          | P-value |
|--------------------------------------------------|--------------|-----------------|---------|
| Age (years) <sup>†</sup>                         | 1.005        | 0.9877 - 1.0226 | 0.56    |
| Male sex                                         | 0.8          | 0.46 - 1.41     | 0.44    |
| Nosocomial infection                             | 1.25         | 0.7 - 2.24      | 0.44    |
| Cardiac insufficiency*                           | 1.24         | 0.6 - 2.55      | 0.57    |
| Any cardiac comorbidity*                         | 1.49         | 0.82 - 2.71     | 0.19    |
| Peripheral arterial disease*                     | 2.47         | 1.23 - 4.95     | 0.02    |
| Cerebrovascular disease*                         | 0.64         | 0.27 - 1.51     | 0.28    |
| Immunosuppression                                | 2.61         | 1.22 - 5.56     | 0.006   |
| Steroids (>10 µg/day)                            | 1.55         | 0.87 - 2.74     | 0.13    |
| Neutropenia (during time at risk)                | 2.07         | 1.19 - 3.61     | 0.01    |
| Diabetes*                                        | 1.22         | 0.68 - 2.19     | 0.51    |
| Renal disease*                                   | 0.5          | 0.18 - 1.4      | 0.14    |
| Malignancies                                     | 1.3          | 0.73 - 2.31     | 0.38    |
| Charlson Score <sup>†</sup>                      | 0.9731       | 0.8695 - 1.089  | 0.63    |
| SAPSII (index day) <sup>†</sup>                  | 1.0464       | 1.0279 - 1.0651 | <0.001  |
| Surgery during hospitalization                   | 0.92         | 0.52 - 1.62     | 0.77    |
| Primary BSI                                      | 1.44         | 0.81 - 2.53     | 0.22    |
| Catheter-related BSI                             | 0.46         | 0.14 - 1.48     | 0.14    |
| Genitourinary infection source                   | 0.15         | 0.04 - 0.63     | 0.0004  |
| Pulmonary infection source                       | 2.13         | 1.18 - 3.81     | 0.02    |
| Intraabdominal infection source                  | 0.63         | 0.23 - 1.74     | 0.34    |
| Wound infection source                           | 1.14         | 0.48 - 2.67     | 0.77    |
| Concomitant infections                           | 1.63         | 0.83 - 3.2      | 0.14    |
| Multiple pathogens in blood culture              | 1.36         | 0.71 - 2.61     | 0.36    |
| Creatinine (mg/dl) <sup>†</sup>                  | 0.9551       | 0.73 - 1.2497   | 0.73    |
| Appropriate antibiotic treatment                 | 0.36         | 0.2 - 0.66      | 0.0021  |
| Appropriate antibiotic treatment within 24 hours | 0.67         | 0.38 - 1.17     | 0.17    |

<sup>†</sup> Continuous variable. The hazard ratio reflects the increase/decrease in mortality risk per unit increase.

\* As defined by Charlson Comorbidity Score [1]

Blue-labeled variables were included in the clinical model (p-value < 0.2).

BSI, blood stream infection; 95% CI, 95% confidence interval; SAPSII, simplified acute physiology score II [2]

**Table S3. Multivariate clinical model in patients with *P. aeruginosa* bloodstream infection**

| <b>Parameter</b>                 | <b>Hazard ratio</b> | <b>95% CI</b>   | <b>P-value</b> |
|----------------------------------|---------------------|-----------------|----------------|
| Immunosuppression                | 2.08                | 0.97 - 4.48     | 0.04           |
| SAPSII (index day)*              | 1.0452              | 1.0272 - 1.0635 | <0.001         |
| Genitourinary infection source   | 0.19                | 0.05 - 0.8      | 0.0034         |
| Appropriate antibiotic treatment | 0.31                | 0.17 - 0.59     | 0.0007         |

\* Continuous variable. The hazard ratio reflects the increase/decrease in mortality risk per unit increase. 95% CI, 95% confidence interval; SAPSII, simplified acute physiology score II [2].

The multivariate model illustrates the association of four clinical and patient-related factors with 30-day mortality. The model was regarded as a clinical model and was chosen as the basis for all screening models, where pathogen-derived factors were included one at a time.

**Table S4. Association of accessory genome and core proteome cluster with 30-day mortality in patients with *P. aeruginosa* bloodstream infection**

| Parameter                        | Hazard ratio | 95% CI       | P-value | Group size (%) |
|----------------------------------|--------------|--------------|---------|----------------|
| <i>Accessory genome clusters</i> |              |              |         |                |
| Acc-cluster 1                    | 0.68         | 0.38 - 1.21  | 0.18    | 84 (50.6%)     |
| Acc-cluster 2                    | 1.95         | 1.005 - 3.79 | 0.06*   | 33 (19.88%)    |
| Acc-cluster 3                    | 1.44         | 0.69 - 3.03  | 0.35    | 29 (17.47%)    |
| Acc-cluster 4                    | 0.67         | 0.31 - 1.47  | 0.3     | 20 (12.05%)    |
| <i>Core proteome clusters</i>    |              |              |         |                |
| Prot-cluster 1                   | 1.24         | 0.63 - 2.42  | 0.54    | 39 (23.49%)    |
| Prot-cluster 2                   | 1.27         | 0.68 - 2.37  | 0.46    | 47 (28.31%)    |
| Prot-cluster 3                   | 0.99         | 0.53 - 1.84  | 0.97    | 36 (21.69%)    |
| Prot-cluster 4                   | 0.6          | 0.28 - 1.28  | 0.17    | 44 (26.51%)    |

\*Wald-Test result: 0.048

95% CI, 95% confidence interval; Acc, accessory genome; Prot, proteome

Inclusion of accessory genome and core proteome clusters into the clinical Cox regression model revealed one accessory genome cluster (acc-cluster 2) associated with 30-day mortality, and thus identified as a high-risk cluster.

**Table S5. Pathogen-derived prognostic biomarker candidates in the accessory genome gene and phenotypic screening models**

| Parameter   | Hazard ratio | 95% CI      | P-value | Frequency (%) |
|-------------|--------------|-------------|---------|---------------|
| <i>helP</i> | 3.21         | 1.63 - 6.3  | 0.0021  | 22 (13.25%)   |
| log-Prot7   | 2.68         | 1.36 - 5.27 | 0.0037  | 166 (100%)    |
| log-Prot214 | 1.85         | 1.25 - 2.74 | 0.0012  | 166 (100%)    |
| log-Prot330 | 0.16         | 0.05 - 0.55 | 0.0023  | 166 (100%)    |

95% CI, 95% confidence interval; Prot, protein  
 LFQ intensities were natural log-transformed for core proteomic data.

Table S5 shows hazard ratios and p-values of the four predictors after integration in the respective screening model. None of the tested variables had reached the Bonferroni corrected p-value threshold ( $p = 0.000021$  for genomic variables,  $p = 0.000046$  for protein level variables). However, the screening model was not a low complex association test. It had already incorporated clinical factors, such as physiological patient status (SAPS II score) and administration of appropriate treatment, which are known to be causally related to mortality. Thus, screening of genomic and protein level factors took already relevant confounders into consideration rather than being just a simple p-value evaluation and selection.

**Table S6. Pathogen-derived factors included in the respective multivariate models**

| <b>Dataset ID</b>                               | <b>Annotation</b>                             |
|-------------------------------------------------|-----------------------------------------------|
| <i>Accessory genome gene multivariate model</i> |                                               |
| gene372                                         | TM2 domain protein                            |
| gene416                                         | PAAR motif protein                            |
| gene457                                         | hypothetical protein                          |
| gene686                                         | hypothetical protein                          |
| gene1065                                        | hypothetical protein                          |
| gene1087                                        | Group II intron-encoded protein LtrA          |
| gene1400                                        | hypothetical protein                          |
| gene1799                                        | hypothetical protein                          |
| gene1866                                        | DEAD/DEAH box helicase (heIP)                 |
| <i>Phenotypic multivariate model</i>            |                                               |
| corenewprot7log                                 | Flagellar basal body protein FlIL             |
| corenewprot214log                               | Bacterioferritin                              |
| corenewprot330log                               | Putative aminotransferase                     |
| corenewprot1378log                              | Activator of ntr-like gene protein, OsmE      |
| corenewprot4554log                              | Alkyl hydroperoxide reductase subunit F, AhpF |
| corenewprot5794log                              | Sulfate-binding protein Sbp                   |
| corenewprot6366log                              | Fumarate hydratase class II, FumC2            |
| corenewprot8867log                              | Glutamine amidotransferase                    |

Statistically significant pathogen-based factors ( $p < 0.05$ ) with the 10% lowest p-values within the screening model were included in the multivariate models. Listed here are the nine factors for the multivariate accessory genome gene model and the eight factors for the multivariate phenotypic model.

**Table S7. Functional annotation of prognostic biomarker candidates**

| Candidate | Annotation                | UniProtKB  | GO-Terms                                         | GO-Identifier | Aspect |
|-----------|---------------------------|------------|--------------------------------------------------|---------------|--------|
| HelP      | DEAD/DEAH box helicase    | A6V9V7     | DNA binding                                      | GO:0003677    | F      |
|           |                           |            | helicase activity                                | GO:0004386    | F      |
|           |                           |            | ATP binding                                      | GO:0005524    | F      |
|           |                           |            | hydrolase activity                               | GO:0016787    | F      |
| Prot7     | FliL                      | A0A022NZV4 | chemotaxis                                       | GO:0006935    | P      |
|           |                           |            | bacterial-type flagellum dependent cell motility | GO:0071973    | P      |
|           |                           |            | bacterial-type flagellum basal body membrane     | GO:0009425    | C      |
|           |                           |            | integral component of membrane                   | GO:0016020    | C      |
|           |                           |            |                                                  | GO:0016021    | C      |
| Prot214   | Bacterioferritin          | A0A069Q2A3 | iron transport                                   | GO:0006826    | P      |
|           |                           |            | cellular iron ion homeostasis                    | GO:0006879    | P      |
|           |                           |            | oxidation-reduction process                      | GO:0055114    | P      |
|           |                           |            | ferroxidase activity                             | GO:0004322    | F      |
|           |                           |            | ferric ion binding                               | GO:0008199    | F      |
|           |                           |            | oxidoreductase activity                          | GO:0016491    | F      |
|           |                           |            | cell                                             | GO:0005623    | C      |
| Prot330   | Probable aminotransferase | Q9HXJ9     | biosynthetic process                             | GO:0009058    | P      |
|           |                           |            | catalytic activity                               | GO:0003824    | F      |
|           |                           |            | transaminase activity                            | GO:0008483    | F      |
|           |                           |            | transferase activity                             | GO:0016740    | F      |
|           |                           |            | pyridoxal phosphate binding                      | GO:0030170    | F      |

P, process; F, function; c, component



**Table S8. Putative virulence factors and non-synonymous SNPs**

| Putative virulence factor (core genome) | Annotation (locus tag)                                                                  | Structural Alteration | SNP prevalence in dataset |
|-----------------------------------------|-----------------------------------------------------------------------------------------|-----------------------|---------------------------|
| <i>algB</i>                             | Alginate biosynthesis protein Alg8 (PA3541)*                                            | L408V                 | 12%                       |
| <i>algA</i>                             | Phosphomannose isomerase / guanosine 5'-diphospho-D-mannose pyrophosphorylase (PA3551)* | V138L                 | 12%                       |
| <i>algB</i>                             | Two-component response regulator AlgB (PA5483)*                                         | L382R                 | 34%                       |
| <i>algC</i>                             | Phosphomannomutase AlgC (PA5322)*                                                       | T393A                 | 81%                       |
| <i>algD</i>                             | GDP-mannose 6-dehydrogenase AlgD (PA3560)*                                              | K313R                 | 28%                       |
| <i>algE</i>                             | Alginate production outer membrane protein AlgE precursor (PA3544)*                     | -                     | -                         |
| <i>algF</i>                             | Alginate o-acetyltransferase AlgF (PA3550)*                                             | G34N                  | 43%                       |
| <i>algG</i>                             | Alginate-c5-mannuronan-epimerase AlgG (PA3545)*                                         | V307I                 | 13%                       |
| <i>algJ</i>                             | Alginate o-acetyltransferase AlgJ (PA3549)*                                             | -                     | -                         |
| <i>algK</i>                             | Alginate biosynthetic protein AlgK precursor (PA3543)*                                  | -                     | -                         |
|                                         |                                                                                         | A55T                  | 11%                       |
|                                         |                                                                                         | A185T                 | 12%                       |
|                                         |                                                                                         | A224V                 | 58%                       |
| <i>alg44</i>                            | Alginate biosynthesis protein Alg44 (PA3542)*                                           | -                     | -                         |
| <i>algL</i>                             | Poly(beta-d-mannuronate) lyase precursor AlgL (PA3547)*                                 | -                     | -                         |
| <i>algQ</i>                             | Alginate regulatory protein AlgQ (PA5255)*                                              | -                     | -                         |
| <i>algR</i>                             | Alginate biosynthesis regulatory protein AlgR (PA5261)*                                 | -                     | -                         |
| <i>algU</i>                             | Sigma factor AlgU (PA0762)*                                                             | -                     | -                         |
| <i>algX</i>                             | Alginate biosynthesis protein AlgX (PA3546)*                                            | E201D                 | 16%                       |
| <i>algZ</i>                             | Alginate biosynthesis protein AlgZ/FimS (PA5262)*                                       | -                     | -                         |
| <i>alpR</i>                             | Probable transcription regulator (PA0906)*                                              | -                     | -                         |
| <i>amrZ</i>                             | Alginate and motility regulator Z (PA3385)*                                             | -                     | -                         |
| <i>aprA</i>                             | Alkaline metalloproteinase precursor (PA1249)*                                          | -                     | -                         |
|                                         |                                                                                         | S113A                 | 47.6%                     |
|                                         |                                                                                         | V335A                 | 12%                       |
|                                         |                                                                                         | Q435K                 | 20.5%                     |
| <i>carR</i>                             | Probable two-component response regulator (PA2657)*                                     | -                     | -                         |
| <i>carS</i>                             | Probable two-component sensor (PA2656)*                                                 | P435S                 | 16.3%                     |
| <i>cdpR</i>                             | Probable transcriptional regulator (PA2588)*                                            | V84M                  | 12%                       |
|                                         |                                                                                         | E154D                 | 27.7%                     |
| <i>cif</i>                              | CFTR inhibitory factor, Cif (PA2934)*                                                   | S208A                 | 87.9%                     |
|                                         |                                                                                         | D285E                 | 47.6%                     |
| <i>dksA</i>                             | Suppressor protein DksA (PA4723)*                                                       | -                     | -                         |
| <i>exoT</i>                             | Exoenzyme T (PA0044)*                                                                   | -                     | -                         |
|                                         |                                                                                         | A83S                  | 51.8%                     |
|                                         |                                                                                         | R163L                 | 24.7%                     |
|                                         |                                                                                         | R302Q                 | 13.3%                     |
|                                         |                                                                                         | G352S                 | 51.8%                     |
|                                         |                                                                                         | Q360L                 | 16.3%                     |
| <i>exsA</i>                             | Transcriptional regulator ExsA (PA1713)*                                                | -                     | -                         |
| <i>exsB</i>                             | Exoenzyme S synthesis protein B (PA1712)*                                               | -                     | -                         |
|                                         |                                                                                         | R52G                  | 32.5%                     |
|                                         |                                                                                         | Q105R                 | 51.8%                     |
|                                         |                                                                                         | A127T                 | 27.1%                     |
| <i>fleQ</i>                             | Transcriptional regulator FleQ (PA1097)*                                                | -                     | -                         |
| <i>fliO</i>                             | Flagellar protein FliO (PA1445)*                                                        | -                     | -                         |
| <i>gacA</i>                             | Response regulator GacA (PA2586)*                                                       | -                     | -                         |
| <i>icmF3</i>                            | Hypothetical protein (PA2361)*                                                          | -                     | -                         |
|                                         |                                                                                         | V14L                  | 18.7%                     |
|                                         |                                                                                         | Y164F                 | 12%                       |
|                                         |                                                                                         | D249N                 | 30%                       |
|                                         |                                                                                         | E302D                 | 14.5%                     |
|                                         |                                                                                         | A536G                 | 10.8%                     |
|                                         |                                                                                         | A566G                 | 30.8%                     |
|                                         |                                                                                         | D663N                 | 66.3%                     |
|                                         |                                                                                         | T757S                 | 28.9%                     |
|                                         |                                                                                         | K1045Q                | 22.9%                     |
|                                         |                                                                                         | R1081G                | 24%                       |
|                                         |                                                                                         | L1236Q                | 12%                       |
|                                         |                                                                                         | T1270I                | 10.8%                     |
| <i>kinB</i>                             | Probable two-component sensor (PA5484)*                                                 | -                     | -                         |
|                                         |                                                                                         | Y50H                  | 34.3%                     |
|                                         |                                                                                         | T74K                  | 22.3%                     |
|                                         |                                                                                         | D112N                 | 16.9%                     |

|             |                                                                     |       |       |
|-------------|---------------------------------------------------------------------|-------|-------|
|             |                                                                     | G141T | 42.2% |
|             |                                                                     | I466T | 29.5% |
| <i>lasA</i> | LasA protease precursor (PA1871)*                                   | L9M   | 66.3% |
|             |                                                                     | P12S  | 21%   |
|             |                                                                     | A111V | 59.6% |
|             |                                                                     | E158G | 12%   |
|             |                                                                     | G340S | 36.7% |
| <i>lasB</i> | Elastase LasB (PA3724)*                                             | Q102R | 28.9% |
|             |                                                                     | G241S | 48.8% |
| <i>lasR</i> | Transcriptional regulator LasR (PA1430)*                            | -     | -     |
| <i>lecA</i> | LecA (PA2570)*                                                      | N89S  | 19.9% |
| <i>morA</i> | Motility regulator (PA4601)*                                        | V88M  | 14.5% |
|             |                                                                     | G98N  | 36.7% |
|             |                                                                     | G124D | 57.2% |
|             |                                                                     | D495E | 36.1% |
| <i>mucA</i> | Anti-sigma factor MucA (PA0763)*                                    | -     | -     |
| <i>mucB</i> | Negative regulator for alginate biosynthesis MucB (PA0764)*         | A211T | 66.3% |
| <i>mucC</i> | Positive regulator for alginate biosynthesis MucC (PA0765)*         | -     | -     |
| <i>mucD</i> | Serine protease MucD precursor (PA0766)*                            | I137V | 50.6% |
|             |                                                                     | Q225E | 22.9% |
|             |                                                                     | V441I | 37.3% |
| <i>muiA</i> | Conserved hypothetical protein (PA1494)*                            | A70T  | 66.3% |
|             |                                                                     | V266I | 39.8% |
|             |                                                                     | V307A | 43.4% |
|             |                                                                     | P329S | 36.1% |
|             |                                                                     | R373H | 12%   |
|             |                                                                     | V511I | 36.1% |
| <i>mvaT</i> | Transcriptional regulator MvaT, P16 subunit (PA4315)*               | -     | -     |
| <i>ndk</i>  | Nucleoside diphosphate kinase (PA3807)*                             | -     | -     |
| <i>phzS</i> | Flavin-containing monooxygenase (PA4217)*                           | Q154L | 53%   |
|             |                                                                     | D256N | 54.2% |
| <i>plcH</i> | Hemolytic phospholipase C precursor (PA0844)*                       | V39I  | 47%   |
|             |                                                                     | A212T | 13.9% |
|             |                                                                     | D338E | 64.5% |
|             |                                                                     | A390V | 11.4% |
|             |                                                                     | A530T | 16.3% |
|             |                                                                     | R665Q | 23.5% |
|             |                                                                     | L706F | 19.3% |
| <i>plcN</i> | Nin-hemolytic phospholipase C precursor (PA3319)*                   | V342I | 26.5% |
| <i>popB</i> | Translocator protein PopB (PA1708)*                                 | A85V  | 52.4% |
|             |                                                                     | R259K | 41.6% |
| <i>popD</i> | Translocator outer membrane protein PopD precursor (PA1709)*        | P39A  | 16.9% |
|             |                                                                     | A57V  | 77.1% |
|             |                                                                     | S101A | 42.2% |
|             |                                                                     | V193A | 36.1% |
|             |                                                                     | G245E | 31.3% |
| <i>pyrD</i> | Dihydroorotate dehydrogenase (PA3050)*                              | K40E  | 12.7% |
|             |                                                                     | K96R  | 61.4% |
| <i>rpoN</i> | RNA polymerase sigma-54 factor (PA4462)*                            | S76P  | 12.7% |
| <i>rsmA</i> | RsmA, regulator of secondary metabolites (PA0905)*                  | -     | -     |
| <i>sbri</i> | Probable sigma-70 factor, ECF subfamily (PA2896)*                   | A7T   | 12%   |
| <i>tspR</i> | Hypothetical protein (PA4857)*                                      | -     | -     |
| <i>eprS</i> | Putative serine protease (PA14_18630) <sup>#</sup>                  | D4A   | 27.7% |
|             |                                                                     | A35T  | 10.2% |
|             |                                                                     | T216S | 14.5% |
|             |                                                                     | S504N | 15.1% |
|             |                                                                     | A634T | 42.8% |
|             |                                                                     | T653A | 38.6% |
|             |                                                                     | T710A | 53%   |
|             |                                                                     | G717R | 16.3% |
|             |                                                                     | A812T | 23.5% |
|             |                                                                     | G909E | 47%   |
|             |                                                                     | T917S | 13.3% |
| <i>feoA</i> | Putative iron transport protein (PA14_56690) <sup>#</sup>           | -     | -     |
| <i>feoB</i> | Putative ferrous iron transport protein B (PA14_56680) <sup>#</sup> | V48A  | 37.9% |
|             |                                                                     | S165E | 18.7% |
|             |                                                                     | Q231R | 32.5% |

|             |                                                                 |       |       |
|-------------|-----------------------------------------------------------------|-------|-------|
|             |                                                                 | L267M | 12%   |
|             |                                                                 | V274I | 23.5% |
|             |                                                                 | V334A | 13.9% |
| <i>higA</i> | Putative virulence-associated protein (PA14_61840) <sup>#</sup> | F23L  | 65%   |
|             |                                                                 | K88E  | 35.5% |
|             |                                                                 | H100Q | 15%   |

---

PAO1 (NC\_002516.2)\* and PA14 (NC\_008463.1)<sup>#</sup> were used as reference templates for SNP calling. Strain ID186 (for PAO1 genes) and ID165 (for PA14 genes) were used as reference for the subsequent analysis in the regression models. All putative virulence factors that belong to the core genome dataset were investigated and listed here. If no structural variation was reported, there were no parsimony-informative SNPs identified that caused a replacement change and had a prevalence > 10% and < 90%.

**Table S9. Helicase superfamily 2 members and *Pseudomonas* species RNA helicases**

| Figure label                                  | Protein name | UniProt accession number | Organism                                  |
|-----------------------------------------------|--------------|--------------------------|-------------------------------------------|
| <i>RNA helicases from Pseudomonas species</i> |              |                          |                                           |
| G1                                            | RL063        | Q7WXZ7                   | <i>P. aeruginosa</i> PA14                 |
| G2                                            | HelP         | A6V9V7                   | <i>P. aeruginosa</i> PA7                  |
| G3                                            | A9513_004725 | A0A1B8THQ5               | <i>Pseudomonas</i> sp. AU12215            |
| G4                                            | O164_02625   | V7DI26                   | <i>P. taiwanensis</i> SJ9                 |
| <i>DEAD-box helicases</i>                     |              |                          |                                           |
| G5                                            | SrmB         | P21507                   | <i>E. coli</i>                            |
| G6                                            | RhlB         | P0A8J8                   | <i>E. coli</i>                            |
| G7                                            | Ava_0642     | Q3MFH0                   | <i>Anabaena variabilis</i>                |
| G8                                            | Ava_1952     | Q3MBR2                   | <i>Anabaena variabilis</i>                |
| G9                                            | RhlE         | P25888                   | <i>E. coli</i>                            |
| G10                                           | CshE         | Q81DF9                   | <i>B. cereus</i>                          |
| G11                                           | CshC         | Q81E85                   | <i>B. cereus</i>                          |
| G12                                           | CshB         | P54475                   | <i>B. cereus</i>                          |
| G13                                           | CshA         | P96614                   | <i>B. cereus</i>                          |
| G14                                           | CshD         | Q814I2                   | <i>B. cereus</i>                          |
| G15                                           | DbpA         | P21693                   | <i>E. coli</i>                            |
| G22                                           | CsdA         | Q46925                   | <i>E. coli</i>                            |
| <i>RecQ</i>                                   |              |                          |                                           |
| G16                                           | RecQ         | P15043                   | <i>E. coli</i>                            |
| G17                                           | RecQ         | O34748                   | <i>B. subtilis</i>                        |
| <i>Ski2-like</i>                              |              |                          |                                           |
| G18                                           | Sthe_0903    | D1C273                   | <i>Sphaerobacter thermophilus</i>         |
| G19                                           | L687_03155   | T5KDA6                   | <i>Microbacterium maritypicum</i>         |
| G20                                           | HR12_24870   | A0A074TV47               | <i>Microbacterium</i> sp.                 |
| G21                                           | Mlut_11980   | C5CBV6                   | <i>Micrococcus luteus</i>                 |
| <i>DEAH-box helicases</i>                     |              |                          |                                           |
| G23                                           | HrpB         | D9QDK8                   | <i>Corynebacterium pseudotuberculosis</i> |
| G24                                           | RAM_06515    | G0G7X3                   | <i>Amycolatopsis mediterranei</i>         |
| G25                                           | HprB         | Q0I751                   | <i>Synechococcus</i> sp.                  |
| G26                                           | HrpB         | Q0C562                   | <i>Hyphomonas neptunium</i>               |
| G27                                           | HrpA         | Q8NP89                   | <i>Corynebacterium glutamicum</i>         |
| G28                                           | HrpA         | P43329                   | <i>E. coli</i>                            |
| G29                                           | HrpA         | O83538                   | <i>Treponema pallidum</i>                 |

Figure labels indicate the labels in figure S6.

**Table S10. Protein levels of secretion system effectors, type IV pilus system factors, and toxins in *helP*<sup>+</sup> and *helP*<sup>-</sup> *P. aeruginosa* strains**

| Factor                             | Median LFQ intensities in <i>helP</i> <sup>+</sup> strains (IQR)     | Number of <i>helP</i> <sup>+</sup> strains | Median LFQ intensities in <i>helP</i> <sup>-</sup> strains (IQR)    | Number of <i>helP</i> <sup>-</sup> strains | p-value* |
|------------------------------------|----------------------------------------------------------------------|--------------------------------------------|---------------------------------------------------------------------|--------------------------------------------|----------|
| <i>Type three secretion system</i> |                                                                      |                                            |                                                                     |                                            |          |
| ExoU                               | 7.54x10 <sup>6</sup> (7.14x10 <sup>6</sup> - 4.35x10 <sup>7</sup> )  | 5                                          | 1.14x10 <sup>6</sup> (5.41x10 <sup>5</sup> - 6.96x10 <sup>6</sup> ) | 45                                         | 0.04     |
| ExoS                               | 1.77x10 <sup>4</sup> (0 - 9.79x10 <sup>4</sup> )                     | 17                                         | 1.35x10 <sup>4</sup> (0 - 5.65x10 <sup>4</sup> )                    | 96                                         | 0.82     |
| ExoT                               | 3.85x10 <sup>4</sup> (0 - 1.08x10 <sup>5</sup> )                     | 22                                         | 0 (0 - 9.28x10 <sup>4</sup> )                                       | 144                                        | 0.51     |
| ExoY                               | 0 (0 - 3.13x10 <sup>5</sup> )                                        | 22                                         | 0 (0 - 2.39x10 <sup>5</sup> )                                       | 131                                        | 0.71     |
| ExsA                               | 1.83x10 <sup>6</sup> (1.07x10 <sup>6</sup> - 5.97x10 <sup>6</sup> )  | 22                                         | 1.47x10 <sup>6</sup> (0 - 3.22x10 <sup>6</sup> )                    | 144                                        | 0.20     |
| PopB                               | 0 (0 - 2.61x10 <sup>5</sup> )                                        | 22                                         | 0 (0 - 5.71x10 <sup>4</sup> )                                       | 144                                        | 0.61     |
| PopD                               | 6.29x10 <sup>4</sup> (0 - 1.34x10 <sup>6</sup> )                     | 22                                         | 0 (0 - 5.48x10 <sup>5</sup> )                                       | 144                                        | 0.65     |
| <i>Type four pilus system</i>      |                                                                      |                                            |                                                                     |                                            |          |
| PilQ                               | 7.65x10 <sup>5</sup> (0 - 1.2x10 <sup>7</sup> )                      | 21                                         | 2.33x10 <sup>5</sup> (0 - 1.01x10 <sup>7</sup> )                    | 142                                        | 0.77     |
| PilV                               | 7.05x10 <sup>6</sup> (4.27x10 <sup>6</sup> - 1.07x10 <sup>7</sup> )  | 22                                         | 7.22x10 <sup>6</sup> (4.56x10 <sup>6</sup> - 1.13x10 <sup>7</sup> ) | 122                                        | 0.59     |
| PilT                               | 3.47x10 <sup>7</sup> (3.06x10 <sup>7</sup> - 4.32x10 <sup>7</sup> )  | 22                                         | 3.93x10 <sup>7</sup> (3.12x10 <sup>7</sup> - 4.62x10 <sup>7</sup> ) | 144                                        | 0.25     |
| PilS                               | 3.24x10 <sup>6</sup> (2.2x10 <sup>6</sup> - 1.45x10 <sup>7</sup> )   | 22                                         | 2.23x10 <sup>6</sup> (0 - 1.78x10 <sup>7</sup> )                    | 122                                        | 0.16     |
| PilR                               | 2.2x10 <sup>7</sup> (1.78x10 <sup>7</sup> - 3.06x10 <sup>7</sup> )   | 22                                         | 2.26x10 <sup>7</sup> (1.67x10 <sup>7</sup> - 3.07x10 <sup>7</sup> ) | 144                                        | 0.97     |
| PilP                               | 3.23x10 <sup>7</sup> (2.44x10 <sup>7</sup> - 4.66x10 <sup>7</sup> )  | 22                                         | 3.48x10 <sup>7</sup> (2.58x10 <sup>7</sup> - 4.95x10 <sup>7</sup> ) | 144                                        | 0.45     |
| PilN                               | 3.06x10 <sup>7</sup> (1.78x10 <sup>7</sup> - 3.26x10 <sup>7</sup> )  | 21                                         | 2.89x10 <sup>7</sup> (2.2x10 <sup>7</sup> - 4.1x10 <sup>7</sup> )   | 142                                        | 0.23     |
| <i>Exotoxins</i>                   |                                                                      |                                            |                                                                     |                                            |          |
| ToxA <sup>†</sup>                  | 5.65x10 <sup>4</sup> (-6.10x10 <sup>4</sup> - 1.74x10 <sup>5</sup> ) | 22                                         | 9.65x10 <sup>4</sup> (-7x10 <sup>3</sup> - 2x10 <sup>5</sup> )      | 140                                        | 0.97     |

Factors were investigated when genes for the investigated factors were present in at least 50 strains. Only strains that had the gene for a respective factor were included in the analysis.

\* by Mann-Whitney rank-sum test

† expressed in only 7 strains, mean (95% confidence interval) was used  
LFQ, label free quantification units; IQR, interquartile range.

Table S10 shows differences in protein level expression of *P. aeruginosa* toxins or type IV pili system according to the presence of the *helP* gene. For each calculation, strains were only considered when they carried the respective gene of interest. For

instance, only 50 strains carried the gene *exoU*, five of them were *heIP* positive, 45 were *heIP* negative. Protein levels of ExoU differed according to the *heIP* status ( $p = 0.04$ ), while all other factors showed no statistically significant differential protein expression according to the presence of the *heIP* gene.

**Table S11. Machine learning estimators of five distinct datasets using various classifiers and preprocessing strategies**

| Dataset | Machine learning classifier | Preprocessing strategy | ROC AUC | 95% CI | fitting status      |
|---------|-----------------------------|------------------------|---------|--------|---------------------|
| ACC     | RF                          | None                   | 0.781   | 0.22   | overfitted          |
| ACC     | RF                          | PCA100                 | 0.781   | 0.27   | overfitted          |
| ACC     | RF                          | Percentile5            | 0.785   | 0.2    | overfitted          |
| ACC     | SVM                         | None                   | 0.698   | 0.2    | fitted              |
| ACC     | SVM                         | PCA100                 | 0.698   | 0.24   | fitted              |
| ACC     | SVM                         | Percentile5            | 0.755   | 0.26   | overfitted          |
| ACC     | LinSVM                      | None                   | 0.826   | 0.17   | overfitted          |
| ACC     | LinSVM                      | PCA100                 | 0.691   | 0.22   | overfitted          |
| ACC     | LinSVM                      | Percentile5            | 0.807   | 0.15   | slightly overfitted |
| ACC     | KNN                         | None                   | 0.638   | 0.26   | overfitted          |
| ACC     | KNN                         | PCA100                 | 0.643   | 0.26   | overfitted          |
| ACC     | KNN                         | Percentile5            | 0.678   | 0.36   | overfitted          |
| ACC     | MLP                         | None                   | 0.667   | 0.26   | overfitted          |
| ACC     | MLP                         | PCA100                 | 0.654   | 0.24   | overfitted          |
| ACC     | MLP                         | Percentile5            | 0.751   | 0.22   | slightly overfitted |
| Pheno   | RF                          | None                   | 0.711   | 0.25   | overfitted          |
| Pheno   | RF                          | PCA100                 | 0.718   | 0.28   | overfitted          |
| Pheno   | RF                          | Percentile5            | 0.718   | 0.19   | overfitted          |
| Pheno   | SVM                         | None                   | 0.753   | 0.27   | slightly overfitted |
| Pheno   | SVM                         | PCA100                 | 0.764   | 0.26   | slightly overfitted |
| Pheno   | SVM                         | Percentile5            | 0.8     | 0.2    | fitted              |
| Pheno   | LinSVM                      | None                   | 0.787   | 0.26   | overfitted          |
| Pheno   | LinSVM                      | PCA100                 | 0.729   | 0.24   | overfitted          |
| Pheno   | LinSVM                      | Percentile5            | 0.817   | 0.21   | slightly overfitted |
| Pheno   | KNN                         | None                   | 0.675   | 0.17   | overfitted          |
| Pheno   | KNN                         | PCA100                 | 0.634   | 0.2    | overfitted          |
| Pheno   | KNN                         | Percentile5            | 0.693   | 0.3    | overfitted          |
| Pheno   | MLP                         | None                   | 0.71    | 0.27   | overfitted          |
| Pheno   | MLP                         | PCA100                 | 0.712   | 0.36   | overfitted          |
| Pheno   | MLP                         | Percentile5            | 0.787   | 0.29   | overfitted          |

|       |        |             |       |       |                     |
|-------|--------|-------------|-------|-------|---------------------|
| SNP   | RF     | None        | 0.799 | 0.2   | slightly overfitted |
| SNP   | RF     | PCA100      | 0.686 | 0.32  | overfitted          |
| SNP   | RF     | Percentile5 | 0.793 | 0.18  | fitted              |
| SNP   | SVM    | None        | 0.752 | 0.27  | overfitted          |
| SNP   | SVM    | PCA100      | 0.744 | 0.25  | overfitted          |
| SNP   | SVM    | Percentile5 | 0.748 | 0.23  | fitted              |
| SNP   | LinSVM | None        | 0.793 | 0.18  | overfitted          |
| SNP   | LinSVM | PCA100      | 0.79  | 0.25  | overfitted          |
| SNP   | LinSVM | Percentile5 | 0.785 | 0.24  | fitted              |
| SNP   | KNN    | None        | 0.632 | 0.24  | overfitted          |
| SNP   | KNN    | PCA100      | 0.632 | 0.24  | overfitted          |
| SNP   | KNN    | Percentile5 | 0.752 | 0.22  | slightly overfitted |
| SNP   | MLP    | None        | 0.768 | 0.23  | overfitted          |
| SNP   | MLP    | PCA100      | 0.748 | 0.25  | overfitted          |
| SNP   | MLP    | Percentile5 | 0.76  | 0.3   | slightly overfitted |
| ALL   | RF     | None        | 0.725 | 0.2   | overfitted          |
| ALL   | RF     | PCA100      | 0.758 | 0.28  | overfitted          |
| ALL   | RF     | Percentile5 | 0.728 | 0.19  | overfitted          |
| ALL   | SVM    | None        | 0.689 | 0.22  | overfitted          |
| ALL   | SVM    | PCA100      | 0.667 | 0.24  | overfitted          |
| ALL   | SVM    | Percentile5 | 0.761 | 0.16  | fitted              |
| ALL   | LinSVM | None        | 0.775 | 0.25  | overfitted          |
| ALL   | LinSVM | PCA100      | 0.725 | 0.32  | overfitted          |
| ALL   | LinSVM | Percentile5 | 0.79  | 0.24  | overfitted          |
| ALL   | KNN    | None        | 0.619 | 0.31  | overfitted          |
| ALL   | KNN    | PCA100      | 0.628 | 0.27  | overfitted          |
| ALL   | KNN    | Percentile5 | 0.647 | 0.38  | overfitted          |
| ALL   | MLP    | None        | 0.668 | 0.295 | overfitted          |
| ALL   | MLP    | PCA100      | 0.603 | 0.25  | overfitted          |
| ALL   | MLP    | Percentile5 | 0.743 | 0.25  | slightly overfitted |
| Final | RF     | None        | 0.788 | 0.26  | slightly overfitted |
| Final | SVM    | None        | 0.837 | 0.29  | slightly overfitted |
| Final | LinSVM | None        | 0.829 | 0.33  | fitted              |
| Final | KNN    | None        | 0.795 | 0.28  | overfitted          |



|       |     |      |       |     |            |
|-------|-----|------|-------|-----|------------|
| Final | MLP | None | 0.838 | 0.3 | overfitted |
|-------|-----|------|-------|-----|------------|

---

\* overfitting/underfitting assessment was done by a visual inspection of the learning curves

ACC, dataset with clinical risk factors and accessory genome features; Pheno, dataset with clinical risk factors, protein level and antibiotic susceptibility features; SNP, dataset with clinical risk factors and virulence gene variation features; ALL, dataset with clinical risk factors and accessory genome, protein level antibiotic susceptibility, and virulence gene variation features; Final, dataset with all features from the final Cox regression model; RF, random forest classifier; SVM, support vector machine classifier; LinSVM, support vector machine classifier; KNN, k nearest neighbor classifier; MPL, Multi-layer Perceptron; PCA100, transformation of all features in an array with a maximum of 100 components; Percentile5, feature array keeps only features that belong to the best 5% according to univariate feature/outcome relation based on p-value determination; ROC AUC; area under the receiver operating characteristic analysis curve; 95% CI; 95% confidence interval.

Blue labels indicate the best indicators from each dataset. These estimators were tested on the hold-out dataset (Table S12).

**Table S12. Testing of machine learning estimators from each dataset on the hold-out dataset**

| Dataset | Machine learning classifier | Preprocessing strategy | ROC AUC | Matthews correlation coefficient | Correct positive classifications (%) | Correct negative classifications (%) | False negative classifications (%) | False positive classifications (%) |
|---------|-----------------------------|------------------------|---------|----------------------------------|--------------------------------------|--------------------------------------|------------------------------------|------------------------------------|
| ACC     | LinSVM                      | Percentile5            | 0.683   | 0.336                            | 7                                    | 16                                   | 3                                  | 8                                  |
| Pheno   | SVM                         | Percentile5            | 0.595   | 0.197                            | 4                                    | 19                                   | 6                                  | 5                                  |
| SNP     | RF                          | Percentile5            | 0.729   | 0.547                            | 5                                    | 23                                   | 5                                  | 1                                  |
| ALL     | SVM                         | Percentile5            | 0.683   | 0.336                            | 7                                    | 16                                   | 3                                  | 8                                  |
| Final   | LinSVM                      | None                   | 0.895   | 0.726                            | 10                                   | 19                                   | 0                                  | 5                                  |

Positive classification = estimator predicted risk of a fatal case

Negative classification = estimator did not predict risk of a fatal case

ACC, dataset with clinical risk factors and accessory genome features; Pheno, dataset with clinical risk factors, protein level and antibiotic susceptibility features; SNP, dataset with clinical risk factors and virulence gene variation features; ALL, dataset with clinical risk factors and accessory genome, protein level antibiotic susceptibility, and virulence gene variation features; Final, dataset with all features from the final Cox regression model; RF, random forest classifier; SVM, support vector machine classifier; LinSVM, support vector machine classifier; Percentile5, feature array keeps only features that belong to the best 5% according to univariate feature/outcome relation based on p-value determination; ROC AUC; area under the receiver operating characteristic analysis curve.

**Figures**

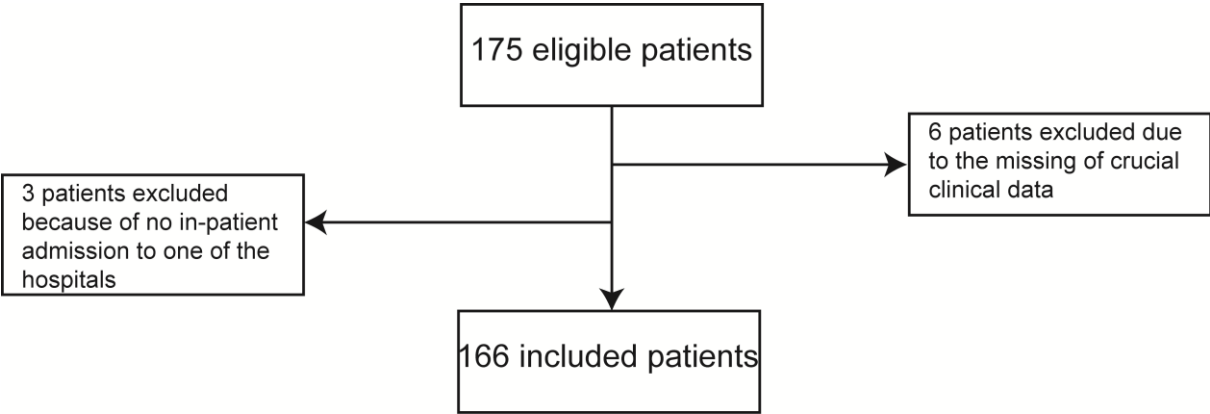

**Figure S1. Flowchart of patient recruitment and exclusions**

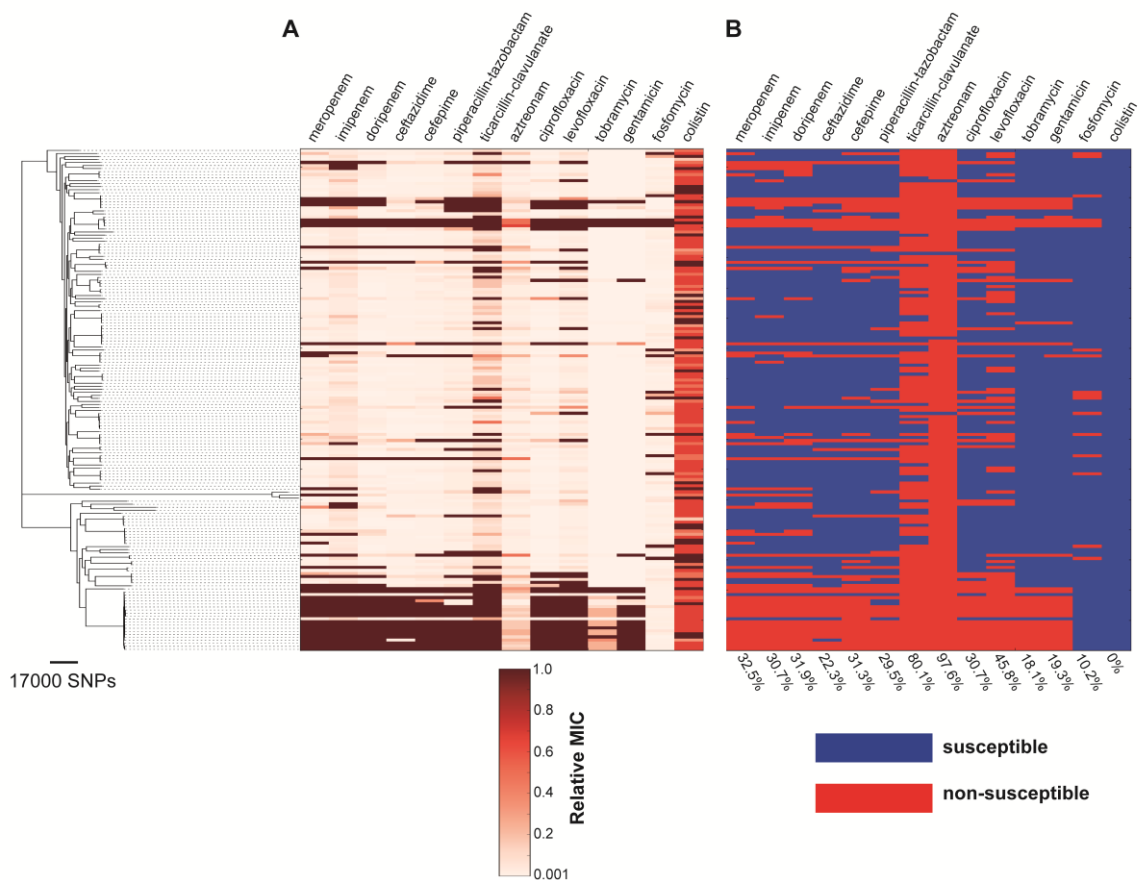

**Figure S2. A)** Distribution of relative minimum inhibitory concentration (MIC) values for various antibiotics relative to the maximum-likelihood tree. Relative MIC values are defined as ratio of the actual MIC value of a strain divided by the highest MIC value for the respective antibiotic in the dataset. The color bar below indicates the values. **B)** Distribution of antibiotic susceptibility for various antibiotics relative to the maximum-likelihood tree. EUCAST breakpoints were used for classification. Resistant and intermediate results were considered non-susceptible. Fosfomycin was rated susceptible when considered appropriate for combination therapy (epidemiological cut-off value 128 mg/L). Non-susceptibility rates are given for any antibiotic under the distribution map.

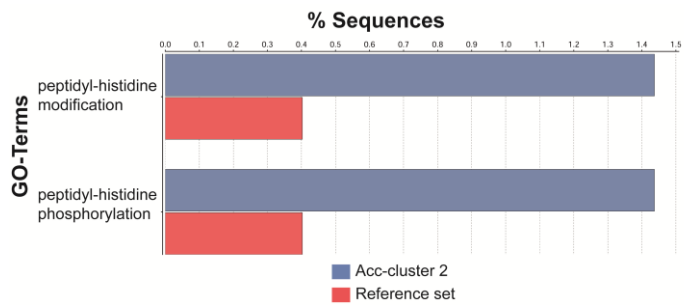

**Figure S3. Enriched bar chart**

Gene ontology (GO) terms from the acc-cluster 2 (13,943 gene clusters) were compared with the other three acc-clusters (reference set: 24,654 gene clusters) regarding a GO-term enrichment.

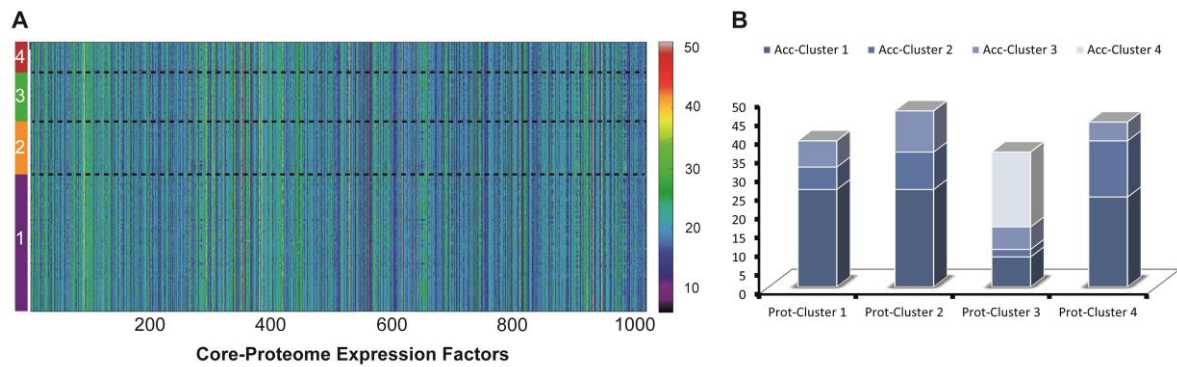

### Figure S4. Core-proteome pattern analysis

(A) A heatmap of the root-normalized ( $x^{1/6}$ ) protein level status from 1078 core proteins (x-axis) structured in blocks according to the accessory genome clusters (y-axis; acc-cluster 1 = purple, acc-cluster 2 = orange, acc-cluster 3 = green, acc-cluster 4 = red) revealed no pattern formation or significant distinction between blocks. A color bar on the right side displays the normalized protein level values. (B) The appearance of a protein level cluster in accessory genome clusters is displayed. It shows that strains from each core proteome (prot) - cluster derive from at least three different acc-clusters with the exception of acc-cluster 4. This genomic cluster was very distinct from the other acc-clusters (Fig 2A, red cluster) and produced only one protein level pattern (prot-cluster 3). However, this core proteome cluster was also a feature of the other three acc-clusters, thus still suggesting that there is not a strong relationship between the accessory genome and protein expression in *P. aeruginosa*.

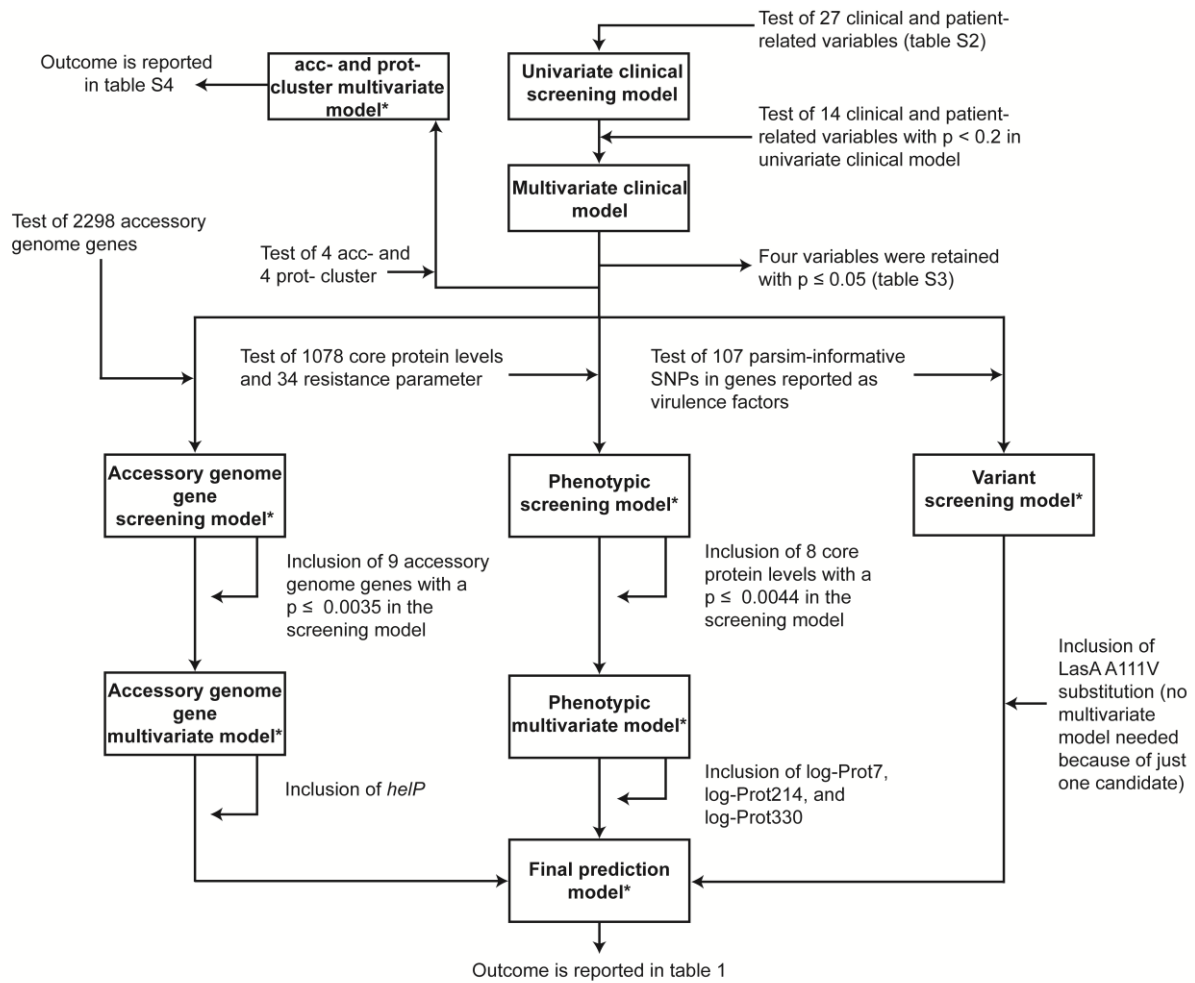

**Figure S5. Flowchart of the mortality predictor analysis**

The four variables from the multivariate clinical model (table S3) were included in all models marked with an asterisk.

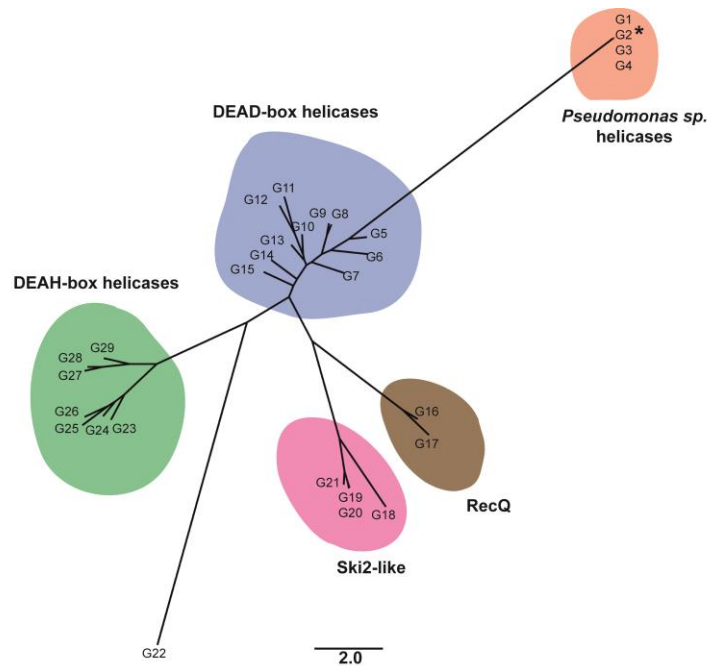

**Figure S6. Unrooted tree of superfamily 2 of helicases**

The maximum-likelihood tree is based on representative members of DEAD-box proteins, DEAH-box proteins, Ski2-like and RecQ-proteins. Annotations and UniProt accession numbers can be found in table S6. Proteins and phylogenetic methodology were chosen according to Redder et al [3]. The asterisk indicates HelP. The 29 protein sequences were aligned by ClustalW [4]. RAxML version (version 8.2.6) was deployed for tree reconstruction with 10000 bootstrap iterations using the “PROTGAMMAAUTO” command for best model determination [5]. FigTree (<http://tree.bio.ed.ac.uk/software/figtree/>) was deployed for tree visualization. The predicted helicases from *P. aeruginosa* were most closely related to DEAD-box helicases. Of note, G22 (CsdA from *Escherichia coli*), which is a presumed DEAD-box helicase, was phylogenetically distant from the rest of the DEAD-box helicases. The scale bar indicates the expected number of changes per site.



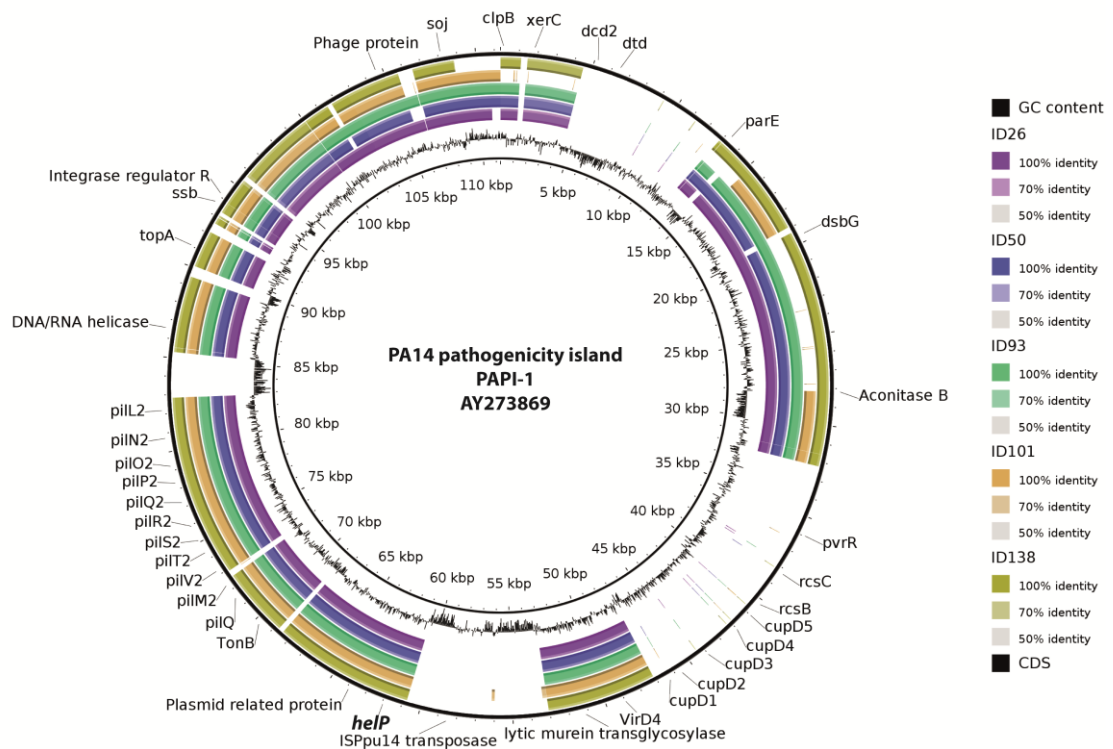

**Figure S7. Reconstruction of the genomic environment of *help***

Genomes of five *help* positive strains were determined by PacBio long-read sequencing. Of these five, *help* was predicted to be plasmid-encoded in four strains (ID26, ID93, ID101, and ID138) and located on the chromosome in strain ID50, based on Illumina sequencing data and plasmidSPAdes. PacBio sequencing determined a chromosomal location of *help* in all strains. Since *help* has a high similarity to a predicted DEAD/DEAH-box helicase (RL063) located on the PA14 pathogenicity island PAPI-1 (GenBank accession number: AY273869), we investigated whether *help* was located within a similar genomic environment in our study strains. For this purpose, we performed a blastn comparison of a genomic stripe containing *help* with PAPI-1 as reference, which is represented by the innermost ring, followed by a second ring that illustrated the GC content. The five following rings show the genomic environment of *help* in all chosen strains (49 kb

upstream and 61 kb downstream of *heIP* according to the position of its homologous gene RL063 in PAPI-1). All strains have a genomic environment that highly resembles PAPI-1 with the exception of some downstream-located regions that are missing in all strains. Regional differences are also visible between the strains, indicating an independent evolution of the PAPI-1 related region. In all strains, a conjugative type IV pili apparatus of PAPI-1 is in close proximity upstream of *heIP*. BRIG has been used for mapping visualization [6].

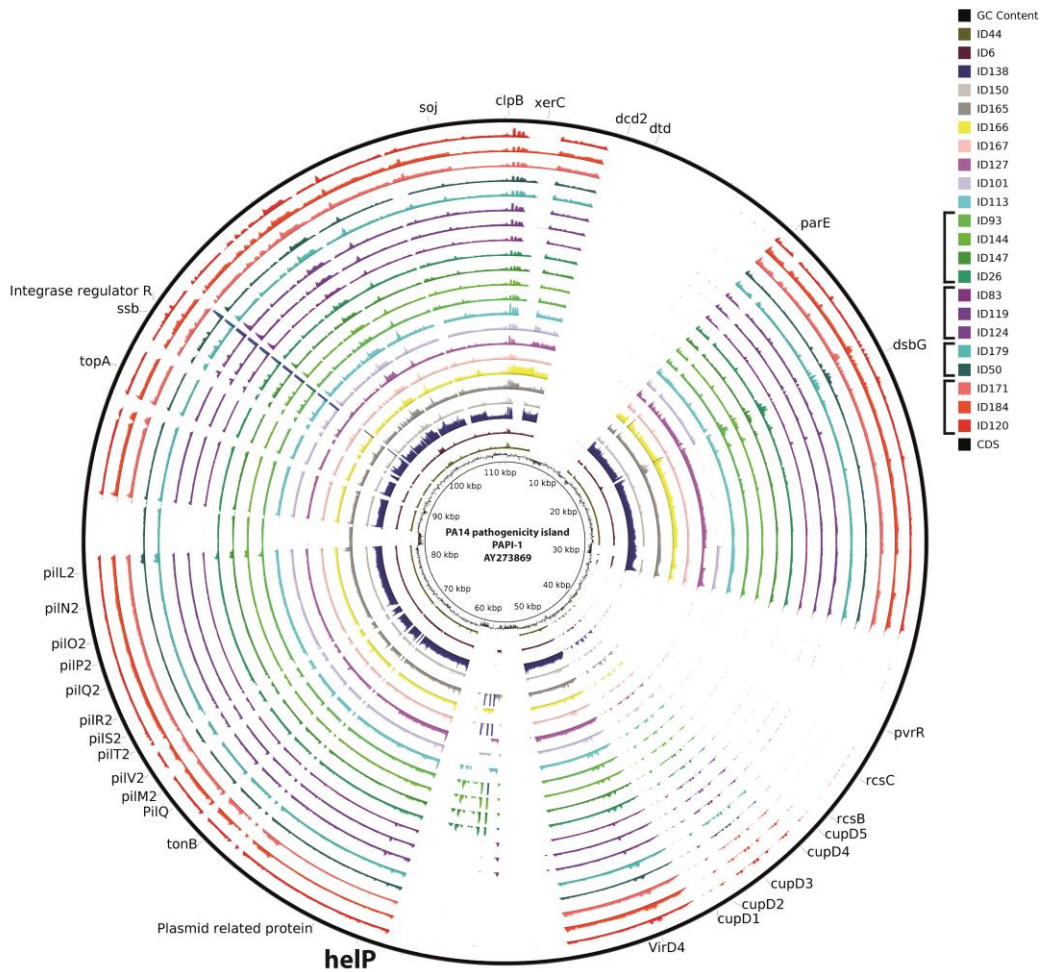

**Figure S8. Reconstruction of PA14 pathogenicity island 1 (PAPI-1) components on the genome of *helP* positive *P. aeruginosa* strains**

Sequence reads from the 22 *helP* positive *P. aeruginosa* strains were mapped against PAPI-1 (accession number: AY273869) using bwa-mem with a minimum mapping score of 30 [7]. Coverage and mapping visualization of sam files was performed using BRIG [6]. The innermost ring represents PAPI-1 reference, followed by a second ring that shows the GC content. All following rings demonstrate the coverage of sequencing reads from each *helP* positive strain over each position of the PAPI-1 reference (indicated by different colors, beginning with ID44 as first strain in the legend that refers to the third innermost ring and so forth). The ring's height reflects the coverage depth. Strains originating from the same phylogenetic cluster are indicated by similar colors and are specifically labeled in the legend. There are 12 strains from four clusters and ten strains that do not genetically cluster with any

other *heIP* positive strain. In accordance with the detailed genomic environment analysis in figure S8, all strains contain large regions of PAPI-1, most likely in the same arrangement as the five strains in figure S8. The lack of the same regions indicates that these regions are also not present in more distant parts of the genome, with some minor exceptions in some strains. Generally, strains that form a phylogenetic cluster have a closely related coverage pattern, illustrating that the PAPI-1-related structure is conserved within a certain clone.

## References

1. Charlson ME, Pompei P, Ales KL, MacKenzie CR: **A new method of classifying prognostic comorbidity in longitudinal studies: development and validation.** *J Chronic Dis* 1987, **40**:373-383.
2. Le Gall JR, Lemeshow S, Saulnier F: **A new Simplified Acute Physiology Score (SAPS II) based on a European/North American multicenter study.** *JAMA* 1993, **270**:2957-2963.
3. Redder P, Hausmann S, Khemici V, Yasrebi H, Linder P: **Bacterial versatility requires DEAD-box RNA helicases.** *FEMS Microbiol Rev* 2015, **39**:392-412.
4. Larkin MA, Blackshields G, Brown NP, Chenna R, McGettigan PA, McWilliam H, Valentin F, Wallace IM, Wilm A, Lopez R, et al: **Clustal W and Clustal X version 2.0.** *Bioinformatics* 2007, **23**:2947-2948.
5. Stamatakis A: **RAxML version 8: a tool for phylogenetic analysis and post-analysis of large phylogenies.** *Bioinformatics* 2014, **30**:1312-1313.
6. Alikhan NF, Petty NK, Ben Zakour NL, Beatson SA: **BLAST Ring Image Generator (BRIG): simple prokaryote genome comparisons.** *BMC Genomics* 2011, **12**:402.
7. Li H, Durbin R: **Fast and accurate short read alignment with Burrows-Wheeler transform.** *Bioinformatics* 2009, **25**:1754-1760.
